# Supplementary material for: Construction of a novel step-scheme CdS/Pt/Bi2MoO6 photocatalyst for efficient photocatalytic fuel denitrification
Source: Royal Society of Chemistry journal article supplement (doi:10.1039/d1ra04417f), 2021-01-01
Supplement: d1ra04417f1.pdf [file d1ra04417f1.pdf]

## Supplementary information

# Construction of Novel Step-scheme CdS/Pt/Bi<sub>2</sub>MoO<sub>6</sub> Photocatalyst for Efficient Photocatalytic Fuel Denitrification

Weineng Hu<sup>1,2,3</sup>, Guiyang Yan<sup>1,2,\*</sup>, Ruowen Liang<sup>1,2</sup>, Mengmeng Jiang<sup>3</sup>,  
Renkun Huang<sup>1,2</sup>, Yuzhou Xia<sup>1,2</sup>, Lu Chen<sup>1,2</sup>, and Yi Lu<sup>1,2</sup>

<sup>1</sup> Department of chemistry, Fujian province university key laboratory of green energy and environment catalysis, Ningde Normal University, Ningde 352100, P. R. China

<sup>2</sup> Department of chemistry, Fujian Provincial Key Laboratory of Featured Materials in Biochemical Industry, Ningde Normal University, Ningde 352100, Fujian, China

<sup>3</sup> State Key Laboratory of Photocatalysis on Energy and Environment, Fuzhou University, Fuzhou 350002, P. R. China

\* Corresponding author: Prof. Guiyang Yan, E-mail: [ygyfjnu@163.com](mailto:ygyfjnu@163.com)

## Supporting Figures and Table

### 1、Details of characterization

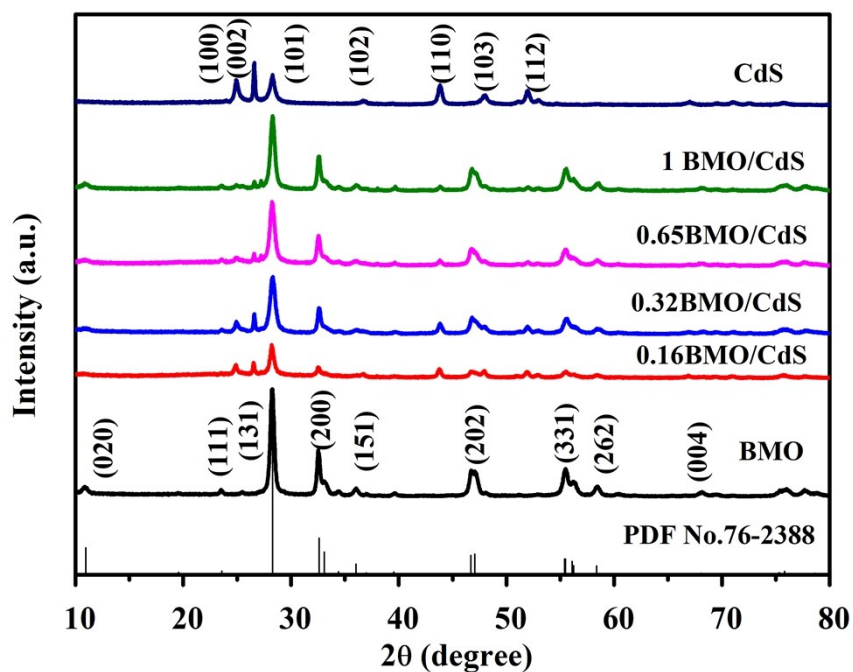

Fig. S1. XRD patterns of a series of  $\text{Bi}_2\text{MoO}_6/\text{CdS}$ .

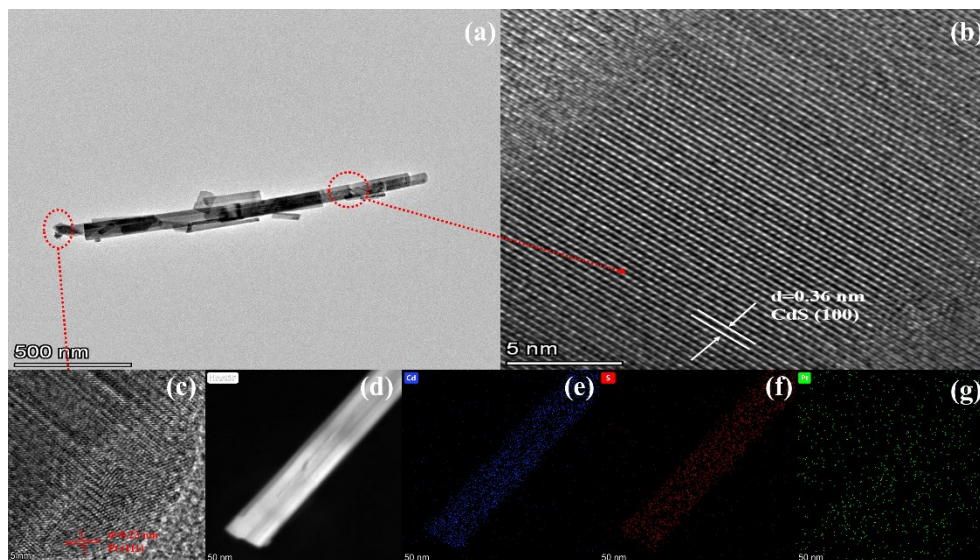

Fig. S2. Typical TEM images of (a) Pt/CdS, (b,c) HRTEM images of Pt/CdS and (d-g) element mapping images of Pt/CdS.

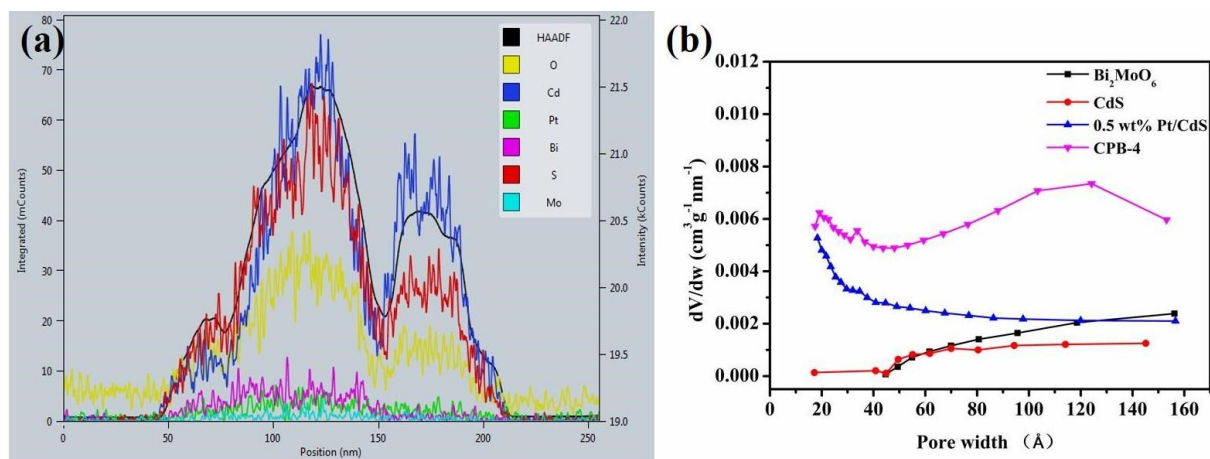

**Fig. S3.** (a) EDS of CPB-4 photocatalysts and (b) pore size distribution curves of photocatalysts

As prepared CdS/Pt/Bi<sub>2</sub>MoO<sub>6</sub> composites (x wt% Bi<sub>2</sub>MoO<sub>6</sub> vs. CdS/Pt) with mass ratios of 10%, 5%, 2.5% and 1% are labeled as CPB-1S, CPB-2S, CPB-3S and CPB-4S, respectively.

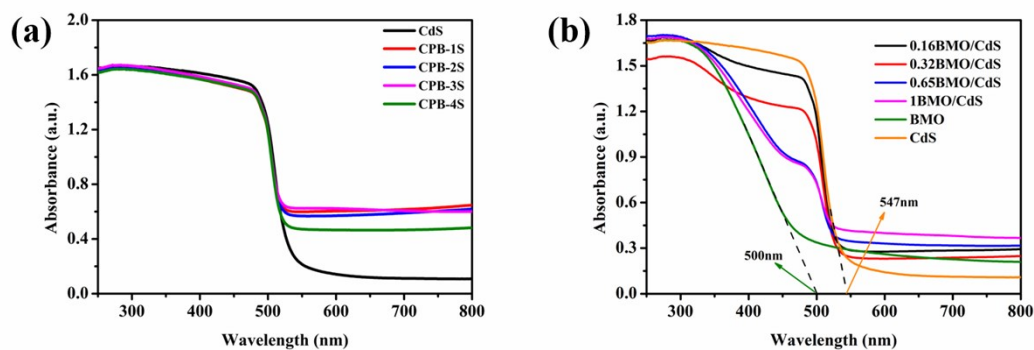

**Fig. S4.** (a) UV-vis diffuse reflectance spectra of CdS, and CPBS (trace amounts of Bi<sub>2</sub>MoO<sub>6</sub>) with different compositions and (b) UV-vis diffuse reflectance spectra of Bi<sub>2</sub>MoO<sub>6</sub>/CdS.

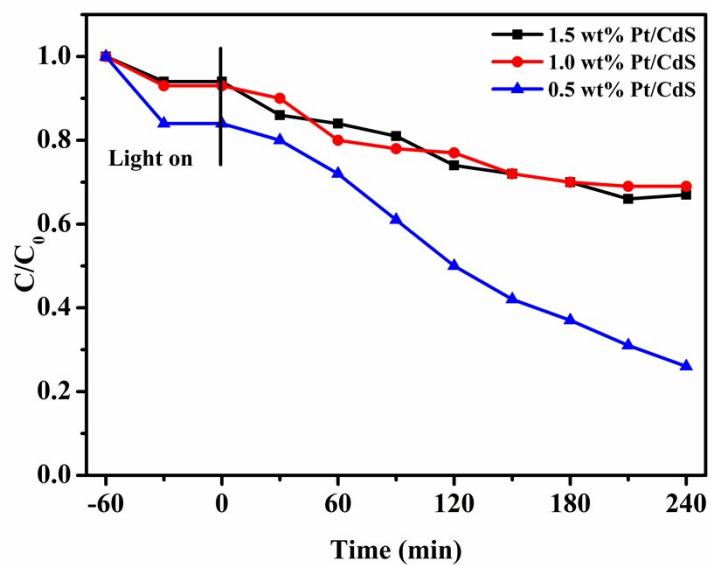

**Fig. S5.** Photocatalytic denitrogenation of pyridine under visible-light irradiation of other ratios of Pt loaded CdS NRs

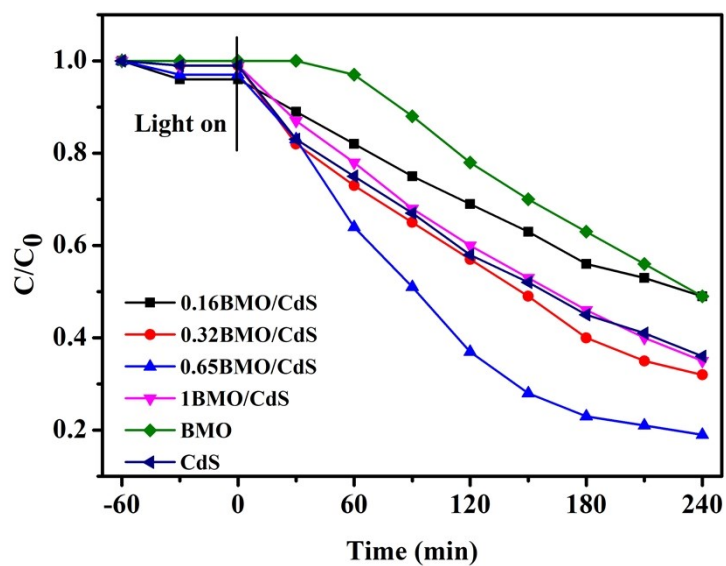

**Fig. S6.** Photocatalytic denitrogenation of pyridine under visible-light irradiation.

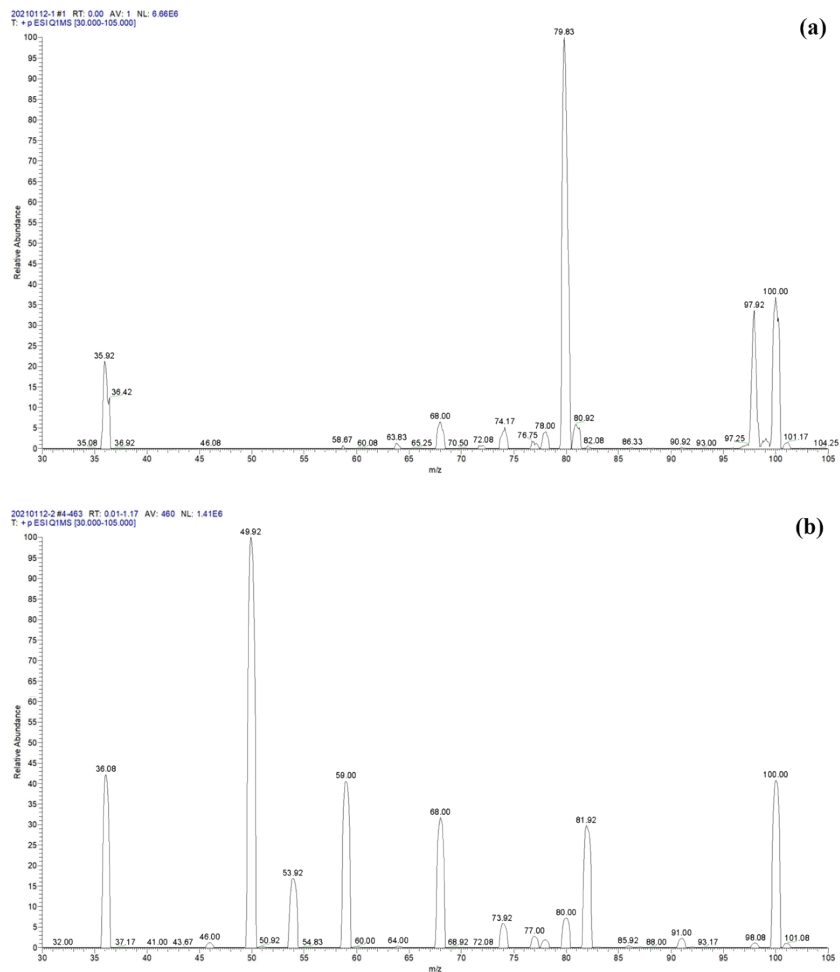

**Fig. S7.** High-performance liquid chromatography profiles of pyridine after different irradiation times: (a) 0h, and (b) 4h

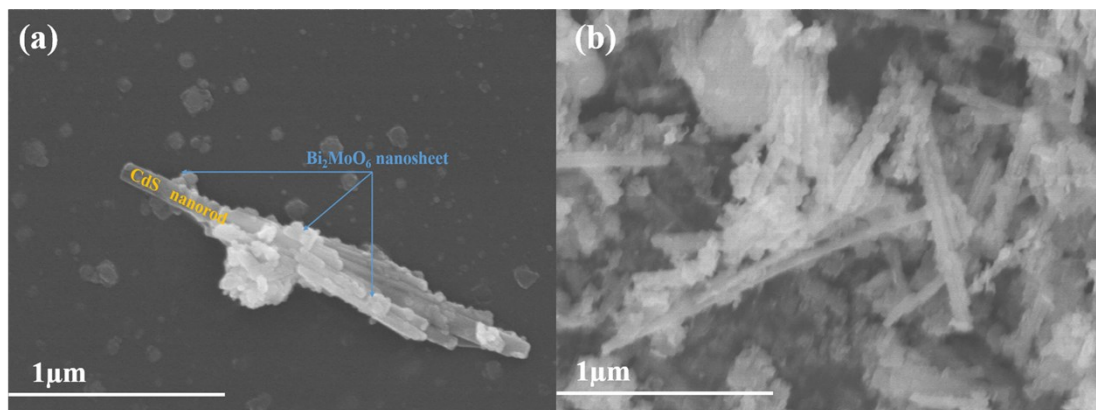

**Fig. S8.** SEM images of (a) Initial CPB-4 and (b) CPB-4 after three cycles

## 2、 *The details of the fuel denitration cycle*

After the first experiment, the photocatalyst was collected into a centrifuge tube, separated by centrifugation (8000 rpm, 6 min), washed several times with deionised water and ethanol, and then were dried in a vacuum drying oven at 80°C for 6 h. Afterward, the produced yellow-green solids were collected. Then it was the same as the first pyridine removal experiment and the concentration was detected after 4 hours of visible light irradiation ( $>420$  nm).

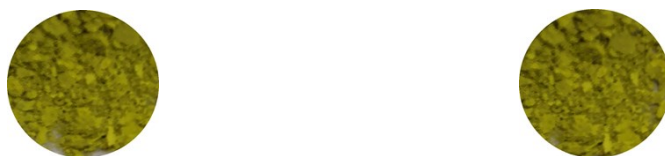

**Fig. S9.** (a) Initial CPB-4, (b) photographs of samples of CPB-4 after three cycles.
